# Supplementary material for: An information encrypted heterogeneous hydrogel with programmable mechanical properties enabled by 3D patterning
Source: Royal Society of Chemistry journal article supplement (doi:10.1039/d3mh00234a), 2023-01-01
Supplement: d3mh00234a1.pdf [file d3mh00234a1.pdf]

## Supplementary information

### Information encrypted heterogeneous hydrogel with programmable mechanical properties enabled by 3D patterning

*Yuhang Ye<sup>†</sup>, Zhengyang Yu<sup>†</sup>, Yifan Zhang, Feng Jiang\**

Sustainable Functional Biomaterials Lab, Department of Wood Science, University of British Columbia, 2900 - 2424 Main Mall, Vancouver, BC V6T 1Z4, Canada.

<sup>†</sup> These two authors contribute equally.

\*Corresponding author: Prof. Feng Jiang E-mail: [feng.jiang@ubc.ca](mailto:feng.jiang@ubc.ca)

**Keywords:** hydrogels; 3D printing; information encryption; cellulose nanofibrils; hydroxypropyl cellulose.

**Figure S1.** Rheology property of pure HPC (35 wt%), storage moduli ( $G'$ ) and loss moduli ( $G''$ ) vs oscillation stress.

**Figure S2.** Rheology property of pure HPC (35 wt%): steady-state viscosity vs shear

**Figure S3.** Rheology property of pure CNF (2.2 wt%), storage moduli ( $G'$ ) and loss moduli ( $G''$ ) vs oscillation stress.

**Figure S4.** Rheology property of pure CNF (2.2 wt%): steady-state viscosity vs shear rate.

**Figure S5.** Rheology property of HPC/CNF at varied ratios: oscillation stress vs Tan theta

**Figure S6.** Appearance change of HPC/CNF ink before and after ambient drying

**Figure S7.** Digital photos representing Patterned HPC-CNF materials at net structure after ambient drying; (f) Digital photos representing the deformation of HPC/CNF materials.

**Figure S8.** Digital photos demonstrating the weak mechanical property of HPC/CNF ink.

**Figure S9.** optical microscopic images representing the existence of crystallites under polarizer.

**Figure S10.** Optical images indicating the appearance change of patterned hydrogels during stretching process (under polarizer)

**Figure S11.** UV-vis spectrum of CNF, HPC, and CNF/HPC materials.

**Figure S12.** Optical photos recording the dual (swelling and heating) stimulated actuation behavior of patterned hydrogel at flower geometry.

**Table S1.** Commonly used methods for adjusting the LCST of HPC.

**Table S2.** Summary of previously reported information encryption hydrogels.

**Video S1.** video recording the great interfacial interaction between hydrogel and patterned phase at room temperature.

**Video S2.** video recording the great interfacial interaction between hydrogel and patterned phase at elevated temperature.

**Video S3.** video recording the mechanical deformation of patterned hydrogels upon being stretched under polarizer.

**Video S4.** video recording the instant responsive behavior of patterned hydrogels to heat.

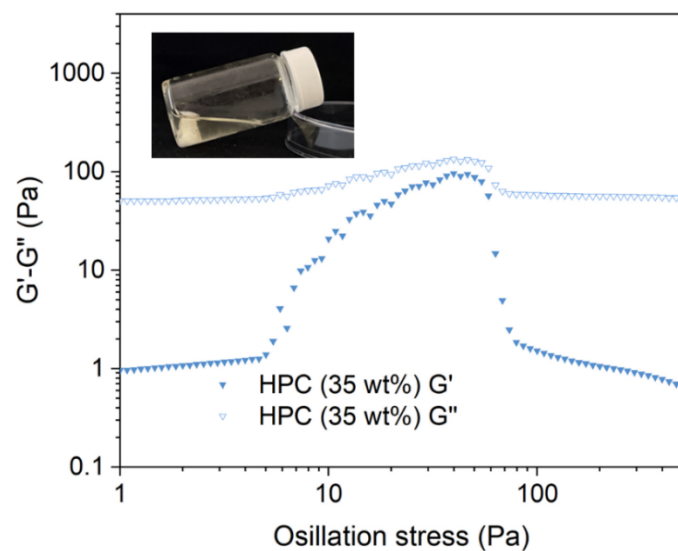

**Figure S1.** Rheology property of pure HPC (35 wt%), storage moduli ( $G'$ ) and loss moduli ( $G''$ ) vs oscillation stress.

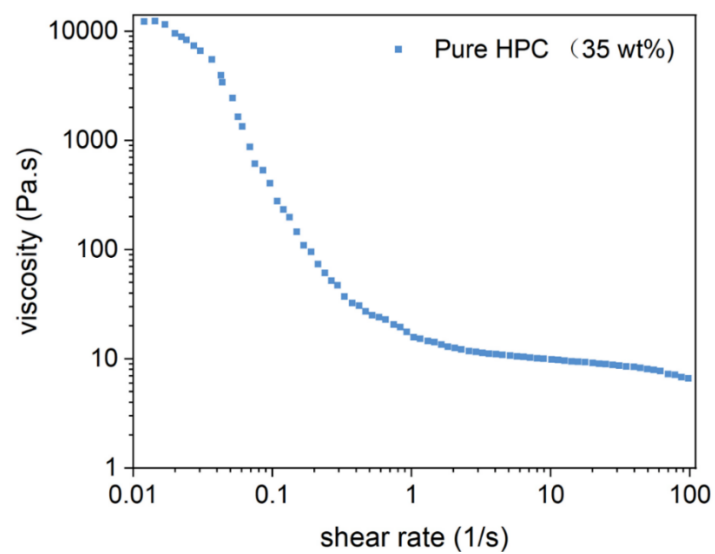

**Figure S2.** Rheology property of pure HPC (35 wt%): steady-state viscosity vs shear rate.

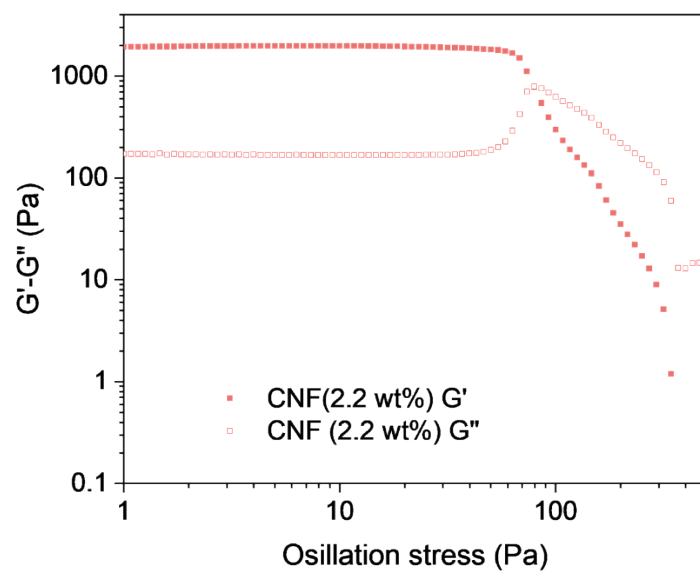

**Figure S3.** Rheology property of pure CNF (2.2 wt%), storage moduli ( $G'$ ) and loss moduli ( $G''$ ) vs oscillation stress.

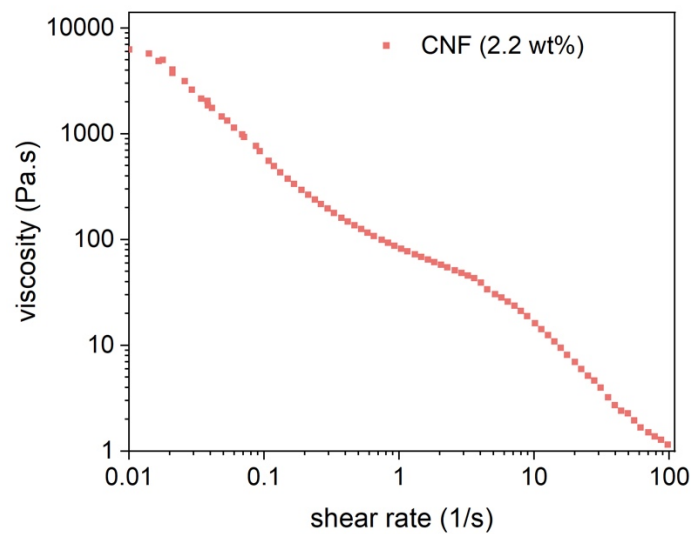

**Figure S4.** Rheology property of pure CNF (2.2 wt%): steady-state viscosity vs shear rate.

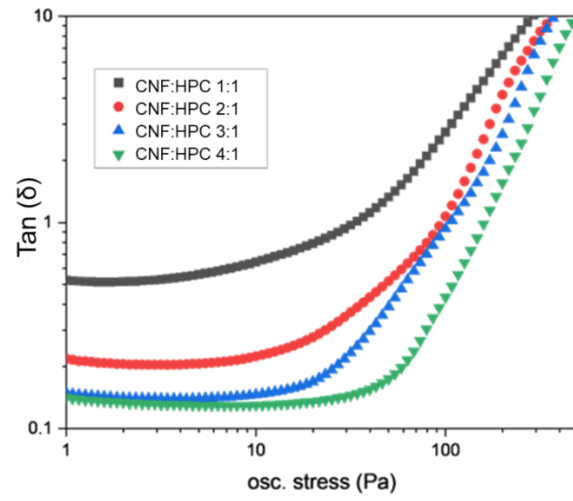

**Figure S5.** Rheology property of HPC/CNF at varied ratios: oscillation stress vs Tan theta

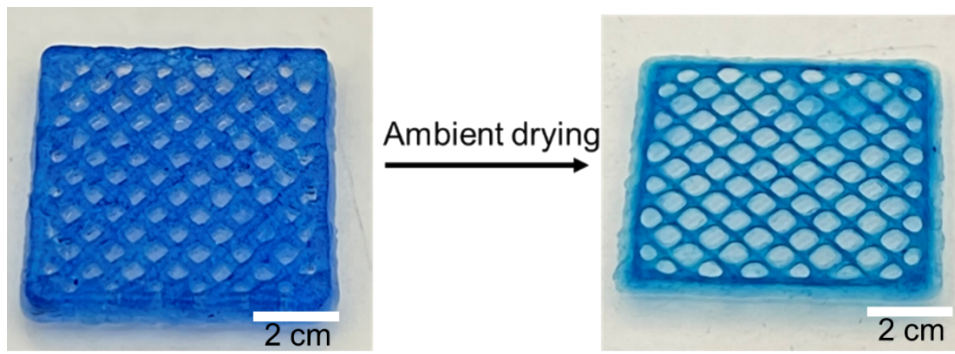

**Figure S6.** Appearance change of HPC/CNF ink before and after ambient drying



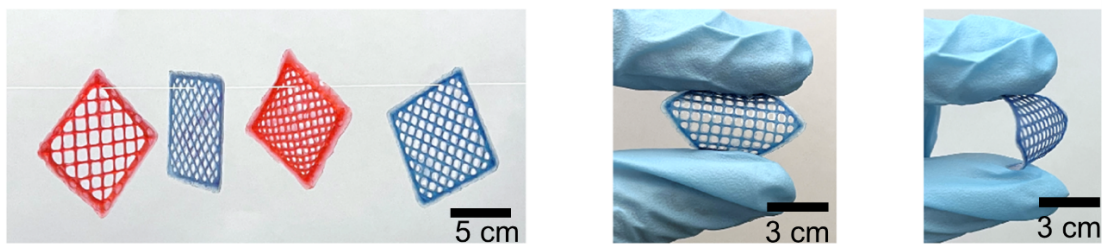

**Figure S7** Digital photos representing (a) Patterned HPC-CNF materials at net structure after ambient drying; (b) representing the deformation of HPC/CNF materials.

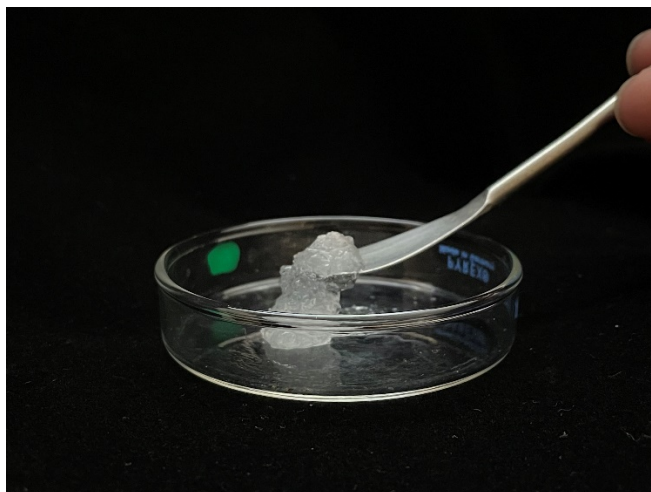

**Figure S8** Digital photos demonstrating the weak mechanical property of HPC/CNF ink.

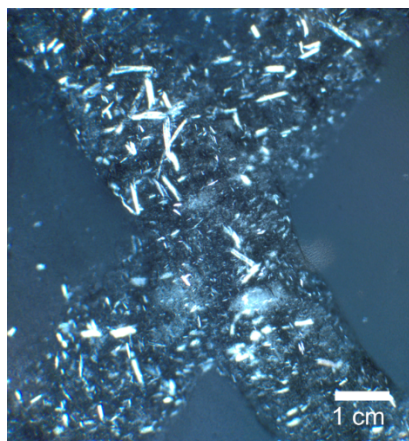

**Figure S9** optical microscopic images representing the existence of crystallites under cross-polarized lenses.

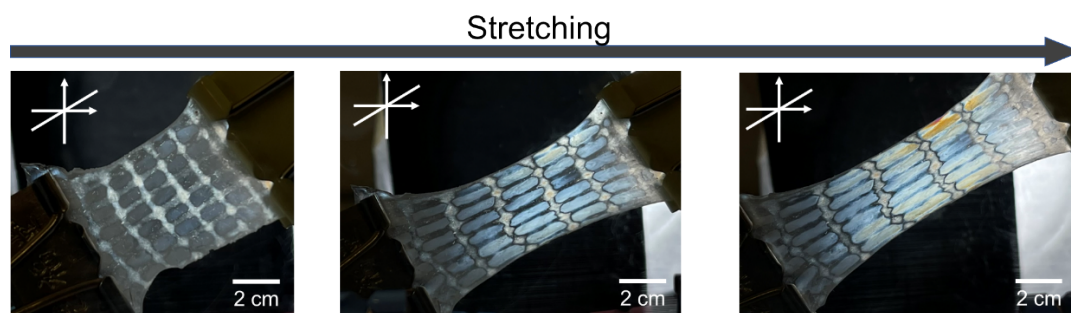

**Figure S10.** Optical images indicating the appearance change of patterned hydrogels during stretching process (under cross-polarized lenses)

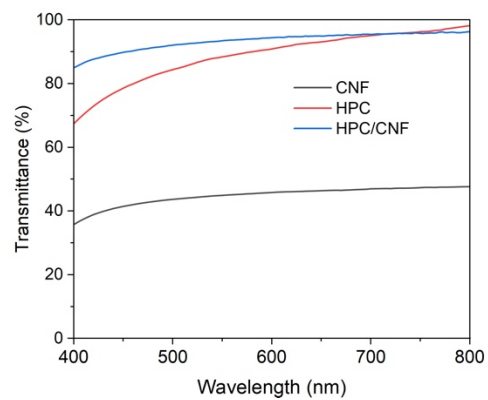

**Figure S11.** UV-vis spectrum of CNF, HPC, and CNF/HPC inks.

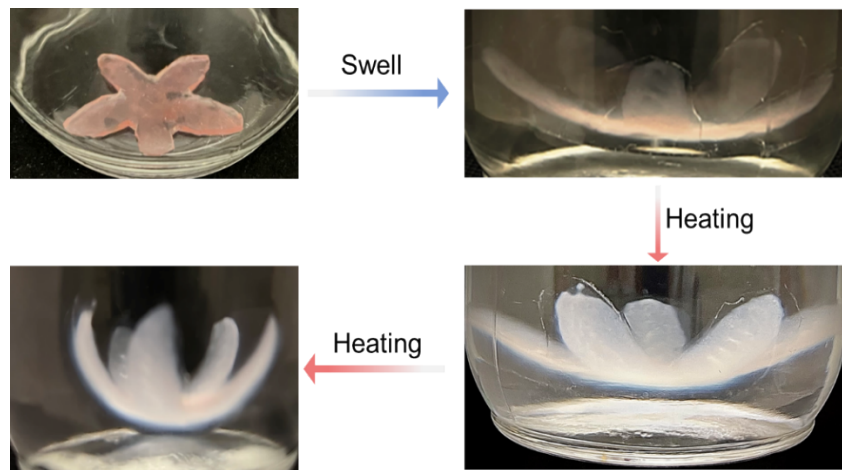

**Figure S12** Optical photos recording the dual (swelling and heating) stimulated actuation behavior of patterned hydrogel at flower geometry.

**Table S1 Commonly used methods for adjusting the LCST of HPC**

| No. | Methods                     | Experiment                         | LCST                           | Reference |
|-----|-----------------------------|------------------------------------|--------------------------------|-----------|
| 1   | Increasing molecular weight | From 80,000 to 370,000             | Decreased from 46.2 to 40.5 °C | 1         |
| 2   | Increasing concentration    | From 0.5% to 4%                    | Decreased from 45.9 to 41 °C   | 1         |
| 3   | Adding PAA                  | Adding 4% PAA                      | Decreased from 45.9 to 35.4 °C | 1         |
| 4   | Adding LiCl                 | Adding 5 M LiCl                    | Decreased from 45 to 20 °C     | 2         |
| 5   | Adding NaCl                 | Adding 0.7 M NaCl                  | Decreased from 43 to 31 °C     | 3         |
| 6   | Adding PAA and adjust pH    | Decreasing pH to 3.2               | Decreased from 41 to 16 °C     | 4         |
| 7   | Adding PAA-PAM              | Distribute HPC into PAA-PAM matrix | Decreased from 45 to 30 °C     | 5         |

**Table S2 Summary of previously reported information encryption hydrogels**

| <b>Material platform</b>    | <b>Methods used for introducing patterns</b>                  | <b>Stimuli</b>           | <b>Color change</b>  | <b>Investigation on mechanical properties</b> | <b>reference</b> |
|-----------------------------|---------------------------------------------------------------|--------------------------|----------------------|-----------------------------------------------|------------------|
| PNIPAM-CDs hydrogel         | Handwriting                                                   | UV light and temperature | Fluorescence         | N.A.                                          | 6                |
| PAM-Pho-CA hydrogels        | Handwriting/mask                                              | UV light                 | Fluorescence         | N.A.                                          | 7                |
| PAM-specific fluorophore    | Assembly of hydrogel blocks with different fluorescent colors | UV light                 | Fluorescence         | N.A.                                          | 8                |
| PAM-lanthanide hydrogels    | Assembly of hydrogel blocks with different fluorescent colors | UV light                 | Fluorescence         | N.A.                                          | 9                |
| P(VI-co-MAAc)-VPTP          | Handwriting/mask                                              | UV light                 | Fluorescence         | N.A.                                          | 10               |
| PAM hydrogel                | Gel for covering pattern background                           | Solvent                  | Transmittance-opaque | N.A.                                          | 11               |
| Cellulose Nanofibers-PNIPAM | Handwriting/mask                                              | Solvent and temperature  | Transmittance-opaque | N.A.                                          | 12               |
| PAA-PMEA-organohydrogel     | Handwriting/mask                                              | solvent                  | Transmittance-opaque | N.A.                                          | 13               |
| PDMA/PSM organogel          | Photomasks                                                    | Solvent and temperature  | Transmittance-opaque | N.A.                                          | 14               |
| This work                   | 3D printing                                                   | Temperature              | Transmittance-opaque | Yes                                           |                  |



## Reference

- 1 L. Zhang, H. Xia, F. Xia, Y. Du, Y. Wu and Y. Gao, *ACS Appl. Energy Mater.*, 2021, **4**, 9783–9791.
- 2 W. Guan, C. Lei, Y. Guo, W. Shi and G. Yu, *Adv. Mater.*, 2022, **2207786**, 1–6.
- 3 E. Weißenborn and B. Braunschweig, *Soft Matter*, 2019, **15**, 2876–2883.
- 4 X. Lu, Z. Hu and J. Schwartz, *Macromolecules*, 2002, **35**, 9164–9168.
- 5 Y. Niu, Y. Zhou, D. Du, X. Ouyang, Z. Yang, W. Lan, F. Fan, S. Zhao, Y. Liu, S. Chen, J. Li and Q. Xu, *Adv. Sci.*, 2022, **9**, 1–9.
- 6 C. D. P. N-isopropylacrylamide, .
- 7 N. Wang, K. K. Yu, K. Li, M. J. Li, X. Wei and X. Q. Yu, *ACS Appl. Mater. Interfaces*, 2020, **12**, 57686–57694.
- 8 X. Ji, R. T. Wu, L. Long, X. S. Ke, C. Guo, Y. J. Ghang, V. M. Lynch, F. Huang and J. L. Sessler, *Adv. Mater.*, 2018, **30**, 1–6.
- 9 Z. Li, H. Chen, B. Li, Y. Xie, X. Gong, X. Liu, H. Li and Y. Zhao, *Adv. Sci.*, 2019, **6**, 1–7.
- 10 C. N. Zhu, T. Bai, H. Wang, J. Ling, F. Huang, W. Hong, Q. Zheng and Z. L. Wu, *Adv. Mater.*, 2021, **33**, 1–8.
- 11 M. Li, H. Lu, X. Wang, Z. Wang, M. Pi, W. Cui and R. Ran, *Small*, 2022, **18**, 1–12.
- 12 Z. Chen, Y. Chen, Y. Guo, Z. Yang, H. Li and H. Liu, *Adv. Funct. Mater.*, , DOI:10.1002/adfm.202201009.
- 13 J. Liu, Z. Chen, Y. Chen, H. U. Rehman, Y. Guo, H. Li and H. Liu, *Adv. Funct. Mater.*, , DOI:10.1002/adfm.202101464.
- 14 F. Shan, X. Le, H. Shang, W. Xie, W. Sun and T. Chen, *ACS Appl. Mater. Interfaces*, 2023, **15**, 7405–7413.
